# Supplementary material for: Chronic Effects of a Training Program Using a Nasal Inspiratory Restriction Device on Elite Cyclists
Source: MDPI journal article supplement (doi:10.3390/ijerph18020777), 2021-01-18
Supplement: s1 [file s1]

## SUPPLEMENTAL FILE

### EFFECT OF A TRAINING PROGRAMME USING A NASAL INSPIRATORY RESTRICTION DEVICE IN ELITE CYCLISTS

#### 1. Bayesian data analysis

All the variables were analyzed following the same workflow: i) graphical data exploration, ii) model definition; iii) prior predictive checking; iv) parameter estimation and graphical diagnostics and v) posterior predictive checking. Here we show the analysis of VE as example.

##### 1.1. Graphical data exploration

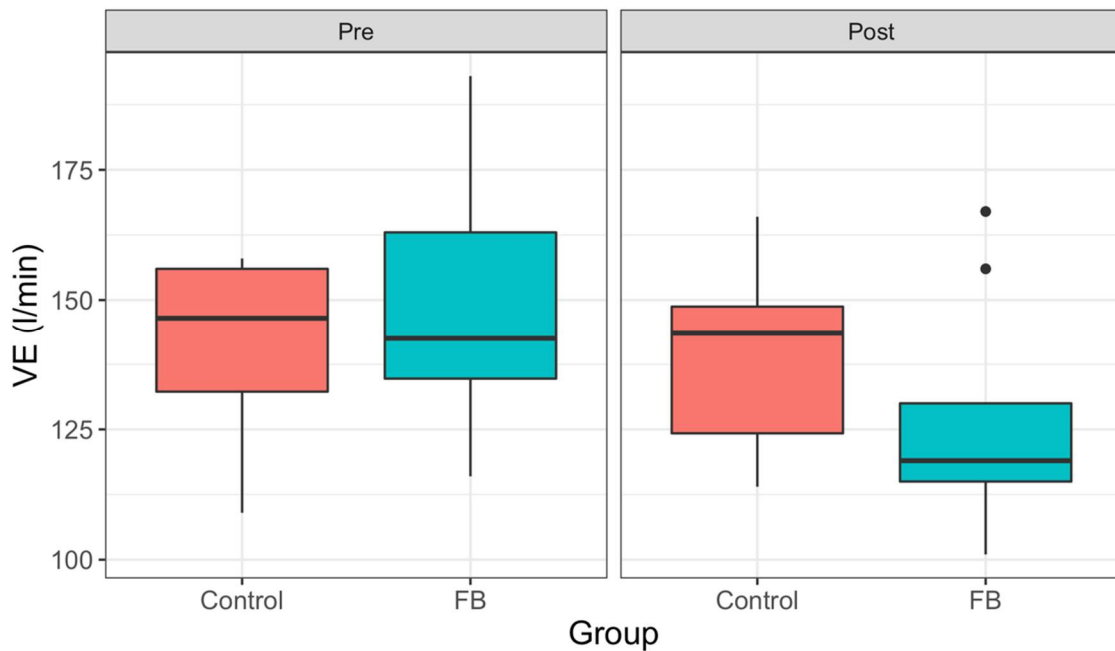

**Figure S1.** Boxplot of VE for Feelbreathe(FB) and Control group at pre-training (Pre) and post-training (Post).

##### 1.2. Model definition

$$VE_i \sim \text{StudentT}(u_i, \sigma, \nu) \text{ [likelihood]}$$

$$u_i = \alpha_{(ID)} + \beta_1 \text{Group}_j + \beta_2 \text{Time}_t + \beta_3 \text{Group}_j \text{Time}_t \text{ [linear model]}$$

$$\sigma \sim \text{half-StudentT}(0, 26.7, 3) \text{ [residual standard deviation]}$$

$$\nu \sim \text{Gamma}(2, 0.1) \text{ [degrees of freedom]}$$

$$\beta_1 \sim \text{Normal}(0, 54) \text{ [weakly informative prior]}$$

$$\beta_2 \sim \text{Normal}(0, 54) \text{ [weakly informative prior]}$$

$$\beta_3 \sim \text{Normal}(0, 54) \text{ [weakly informative prior]}$$

$\alpha_{[ID]} \sim \text{Normal}(\alpha, \sigma_\alpha)$  [adaptive prior]

$\alpha \sim \text{StudentT}(138, 26.7, 3)$  [prior for average ID]

$\sigma_\alpha \sim \text{half-StudentT}(0, 26.7, 3)$  [prior for standard deviation of ID]

### 1.3. Prior predictive checking

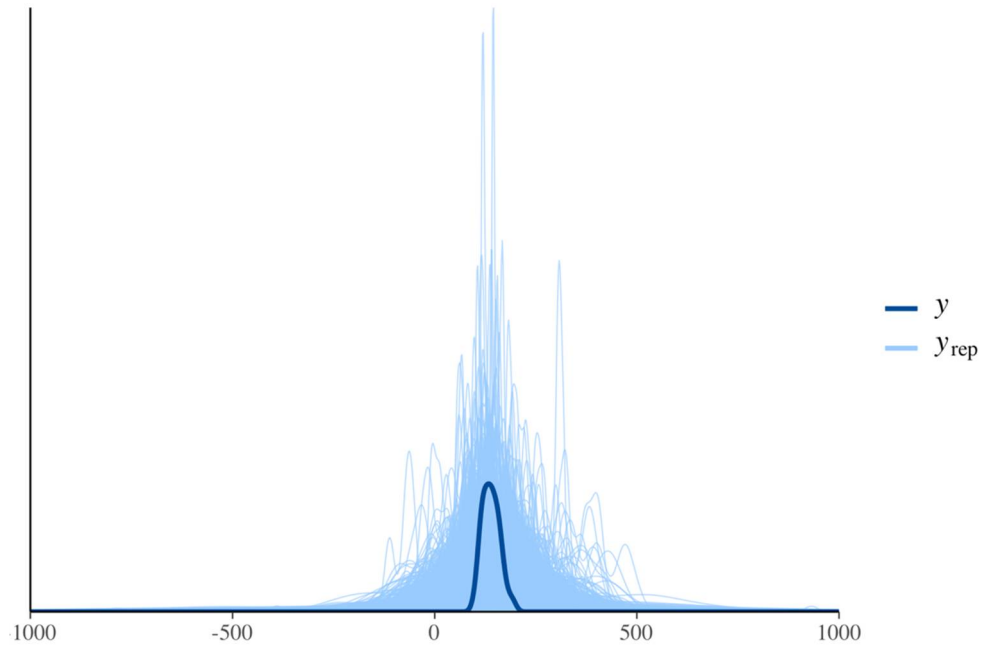

**Figure S2.** Graphical representation of the empirical distribution of the data ( $y$ ) and simulated data from the prior predictive distribution ( $y_{\text{rep}}$ ).

### 1.4. Parameter estimation and graphical diagnostics

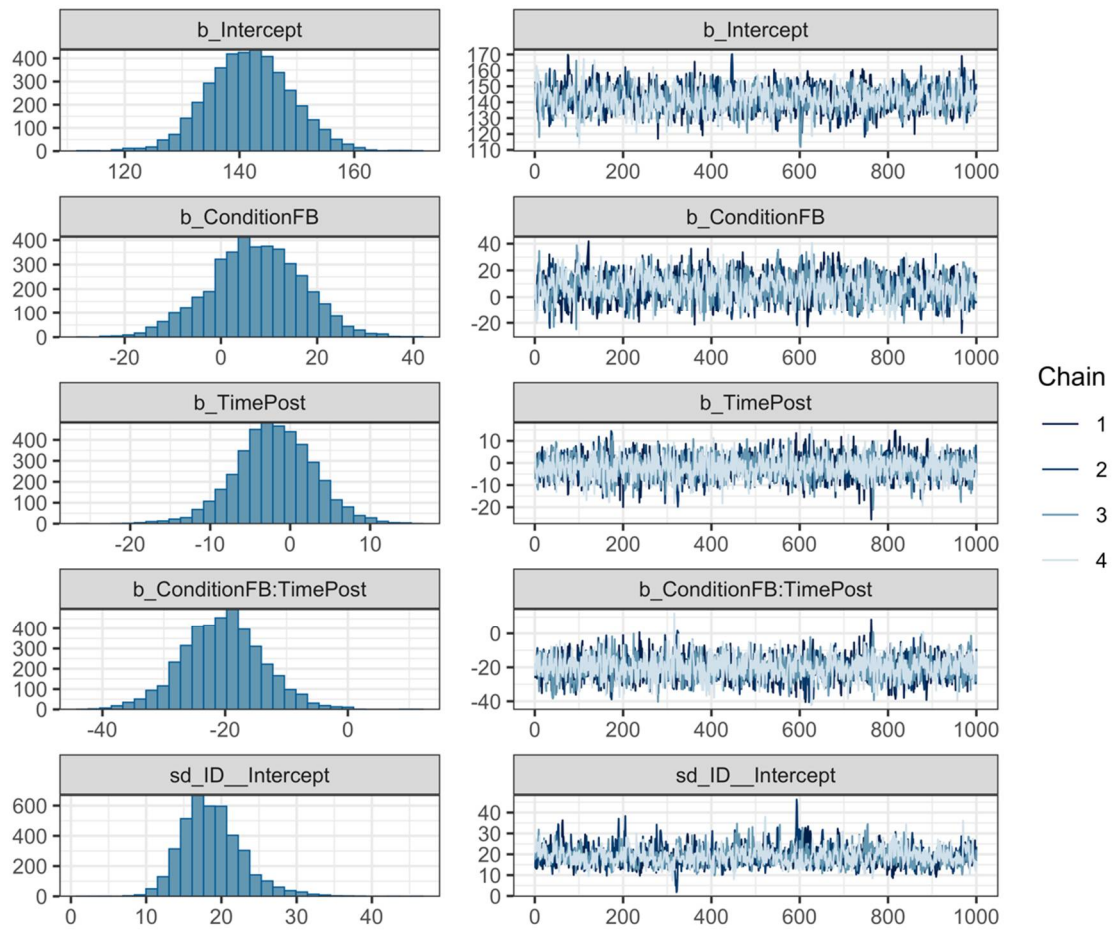

**Figure S3.** Left column represents histogram of each parameter estimated. Right column are traceplots of the four Markov chains.

## 1.5. Posterior predictive checking

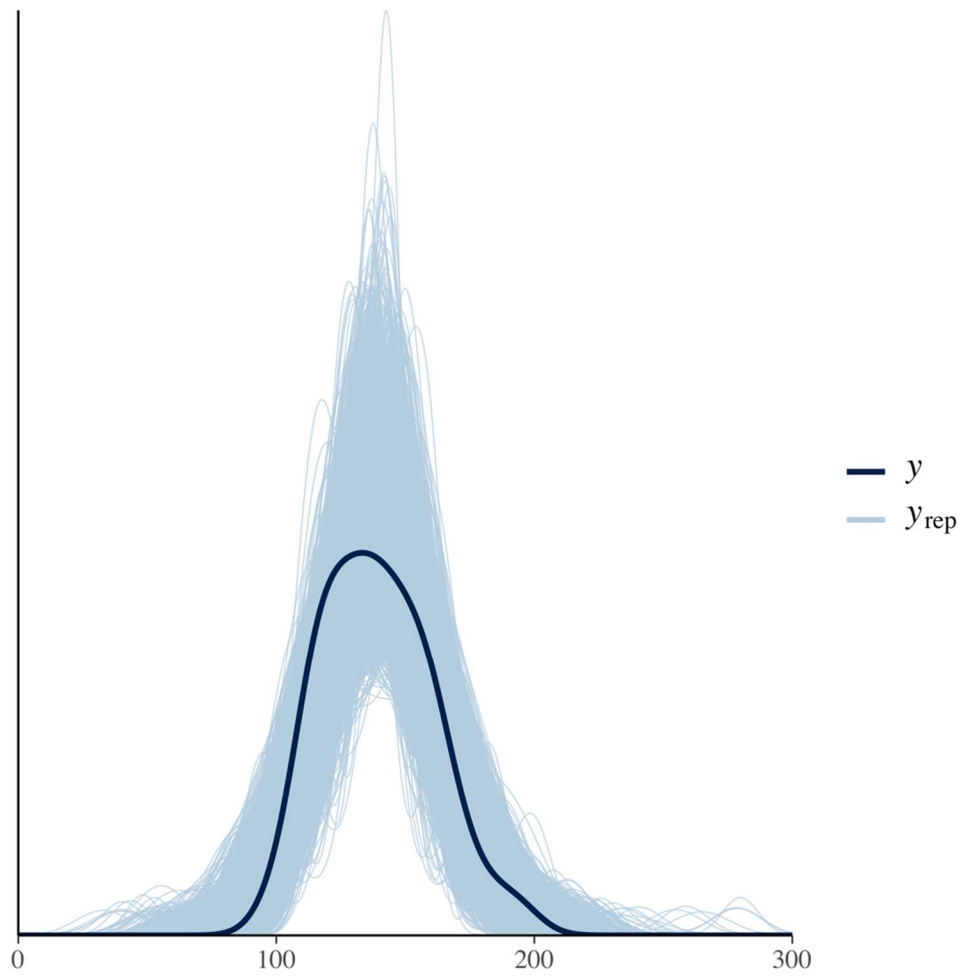

**Figure S4.** Graphical representation of the empirical distribution of the data ( $y$ ) and simulated data from the posterior predictive distribution ( $y_{\text{rep}}$ ).
